# Supplementary material for: The Transcription Factor ZafA Regulates the Homeostatic and Adaptive Response to Zinc Starvation in Aspergillus fumigatus
Source: MDPI journal article supplement (doi:10.3390/genes9070318), 2018-06-26
Supplement: s1 [file s1]

**Table S8.** All possible ZR motifs harboring one substitution out of the conserved hexanucleotide core (5'-CARGGT-3') with respect to the ZR consensus motif (ZR0).

| ZR  | DNA sequence    |
|-----|-----------------|
| ZR0 | DYYVYCARGGTVYYY |
| ZR1 | CYYVYCARGGTVYYY |
| ZR2 | DRYVYCARGGTVYYY |
| ZR3 | DYRVYCARGGTVYYY |
| ZR4 | DYYTYCARGGTVYYY |
| ZR5 | DYYVRCARGGTVYYY |
| ZR6 | DYYVYCARGGTYYY  |
| ZR7 | DYYVYCARGGTVRY  |
| ZR8 | DYYVYCARGGTVYR  |
| ZR9 | DYYVYCARGGTVYYR |

D = G or A or T

V = G or A or

R = G or A

Y = C or T
