# Supplementary material for: The Transcription Factor ZafA Regulates the Homeostatic and Adaptive Response to Zinc Starvation in Aspergillus fumigatus
Source: MDPI journal article supplement (doi:10.3390/genes9070318), 2018-06-26
Supplement: s1 [file s1]

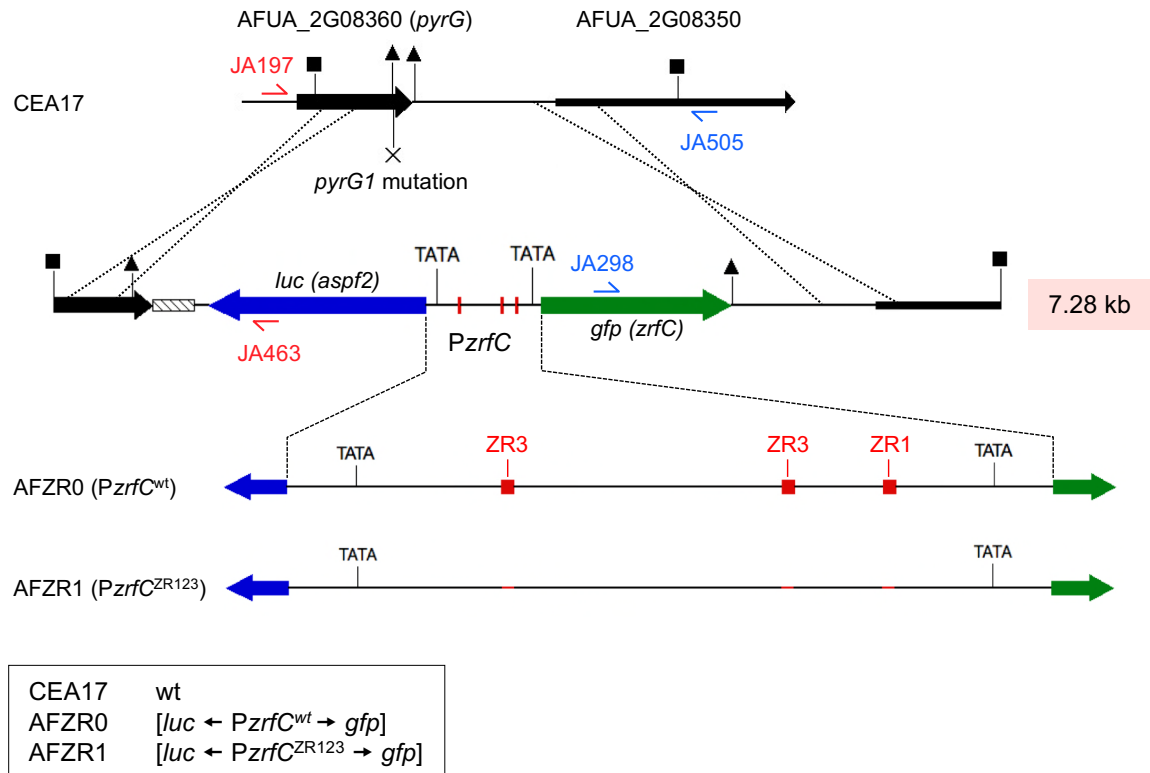

**Figure S1. Construction of strains used to show the function of ZafA in regulating gene expression through binding to the ZR motifs *in vivo*.** Schematic representation of the construction of the derivative uridine-uracil-prototrophic *PyrG*<sup>+</sup> *A. fumigatus* strains AFZR0 and AFZR1 that harbored the coding sequence of the firefly luciferase (*luc*, blue arrow) and green fluorescent protein (*gfp*, green arrow) under the control of the divergent *asf2-zrfC* promoter (abbreviated as *PzrfC*). The three ZR motifs present in *PzrfC* (red boxes) had been inactivated by site directed mutagenesis in the mutant version of this promoter (*PzrfC*<sup>ZR123</sup>). EcoRI-EcoRI DNA fragments of 7286 bp excised from plasmids pPYRGQ191 and pPYRGQ193, which carried respectively the [*luc* ← *PzrfC*<sup>wt</sup> → *gfp*] and [*luc* ← *PzrfC*<sup>ZR123</sup> → *gfp*] constructs, were used to transform the CEA17 uridine-uracil-auxotrophic *pyrG1* strain to generate respectively the AFZR0 and AFZR1 strains. Both strains harboured the DNA fragment of interest inserted at the *pyrG* locus between their AFUA\_2G08360 (*pyrG*) and AFUA\_2G08350 loci, as verified by PCR analyses using the pairs of oligonucleotides JA197/JA505, JA197/JA463 and JA298/JA505.
