# Supplementary material for: The Transcription Factor ZafA Regulates the Homeostatic and Adaptive Response to Zinc Starvation in Aspergillus fumigatus
Source: MDPI journal article supplement (doi:10.3390/genes9070318), 2018-06-26
Supplement: s1 [file s1]

**Table S1.** Oligonucleotides used for RT-qPCR

| Gene ID      | Oligonucleotide | 5'-sequence-3'               |
|--------------|-----------------|------------------------------|
| 18S rRNA     | 18SRNA-D        | TGTTAAACCCTGTCGTGCTG         |
| 18S rRNA     | 18SRNA-R        | GTACAAAGGGCAGGGACGTA         |
| AFUA_1G01550 | ZRFA-D1         | TGATATACAGTGGGTTGGTCGAGTTGC  |
| AFUA_1G01550 | ZRFA-R1         | ATCCCAGCTCCCAGGAGTGTAC       |
| AFUA_1G02150 | GFDA-D          | TCTTTGGTGCCACTATCGACACGAG    |
| AFUA_1G02150 | GFDA-R          | GATGGGCTGCTTCCTCTCAATGC      |
| AFUA_1G03150 | ERG24A-D        | GTACATCCAGACGTCTAGTGGCTCG    |
| AFUA_1G03150 | ERG24A-R        | TGGGCAAGGAATATGACCATGACATCAG |
| AFUA_1G04620 | PODH-D          | TCCGCTCAGTTCGAGAAGCTCAAG     |
| AFUA_1G04620 | PODH-R          | ACACGGTCCTTGTTGGCGTACAC      |
| AFUA_1G07480 | HEM13-D         | AAGCGCAAGGACATGCCCTTCAC      |
| AFUA_1G07480 | HEM13-R         | GCAAGCTCATCAAGATACTCTCGACACG |
| AFUA_1G10060 | AHPA-D          | CAGCGACCACATACAAGAGCAGC      |
| AFUA_1G10060 | AHPA-R          | CGTTCAAATCACCGGGGAGATCAC     |
| AFUA_1G10080 | ZAFA-D1         | GGCAAGTCATTTACCGACAGC        |
| AFUA_1G10080 | ZAFA-R1         | TCGATGACTTGACATGTTGGACG      |
| AFUA_1G10130 | SAHA-D          | GTCGTCTGGTCAACCTTGCGTG       |
| AFUA_1G10130 | SAHA-R          | GTGGTGCCGAACCTCGACGTACTTC    |
| AFUA_1G12830 | NIAD-D          | CTGTGTCGAGCCGAACCTTGATGC     |
| AFUA_1G12830 | NIAD-R          | CGAACTCCTTCAGAAGTGCTTCACCG   |
| AFUA_1G13490 | SPE3-D          | CCGAGAACCAATGGCTGCATCTG      |
| AFUA_1G13490 | SPE3-R          | TGCAGCAGACCATGAAGCCGATC      |
| AFUA_1G13510 | FACB-D          | GCTGGCCGTCTAAGACTTGTTATGC    |
| AFUA_1G13510 | FACB-R          | CGACGAGAAAGGTGTCTGATCAAGAG   |
| AFUA_1G14550 | SODC-D1         | GGATGGGGTTGGTTAGTGACCG       |
| AFUA_1G14550 | SODC-R          | CTGAAGGTAGTAAGCATGCTCCAC     |
| AFUA_1G15590 | SDH4-D          | CCAAGACCAAGACGTTCTGGAC       |
| AFUA_1G15590 | SDH4-R          | TGATGGCCTCTGTGATACCAACATCG   |
| AFUA_1G17190 | SIDI-D          | GCCATCTTCGATGAGGAGGGTTACTG   |
| AFUA_1G17190 | SIDI-R          | GATTACGGAGGCTACCTCGATGGC     |
| AFUA_2G00320 | ERG3B-D         | GCTATTCGACAAGCAGCAACGGC      |
| AFUA_2G00320 | ERG3B-R         | GTCTTGCTCATAGCACCGATCGTCAG   |
| AFUA_2G01260 | SRBA-D1         | GTGCATGTGGCCGACTATTCCTGTG    |
| AFUA_2G01260 | SRBA-R          | CAAGCTTCTGGCAGTAGCGTCATCATC  |
| AFUA_2G03010 | COX4-D          | TGACGGTATCTCGTGATCGTCCTATCG  |
| AFUA_2G03010 | COX4-R          | GGTACCAGTACTCAGGCTTGACGTAG   |
| AFUA_2G03700 | HMG1-D          | CGCTCGGCAACTTGCTCGAATTG      |
| AFUA_2G03700 | HMG1-R          | GTAGAAGTCCGTGTCGTAGCAGCAC    |
| AFUA_2G03860 | ZRFB-D          | ACCGGCAGAAGAAGCATTGA         |
| AFUA_2G03860 | ZRFB-R          | ACCGCATCACCATCAACTCA         |
| AFUA_2G07680 | SIDA-D1         | ACTCCTGAGCAAGGTTCAACACTTGAG  |
| AFUA_2G07680 | SIDA-R1         | GCCAGTACCGACAGCAAACCTGTCAC   |
| AFUA_2G08740 | qZRFF2-D        | CGTATTCCTCTCATGTGCTCG        |
| AFUA_2G08740 | qZRFF2-R        | AGAGCCATTTGCCTGGTTCG         |
| AFUA_2G09870 | TIF35-D         | CGAGAGAATGGCTGGCAAGTACG      |
| AFUA_2G09870 | TIF35-R         | GCGACCGAAACGCTCGAACAAG       |
| AFUA_2G10360 | BNA5-D          | TGACCTCAAACCGAGAATTCCGAG     |
| AFUA_2G10360 | BNA5-R          | TCAACGATTCAAGGACACGGTCGAG    |
| AFUA_2G11120 | GTMA-D          | AGTCATCCCTGTGCCGAAAGAGAC     |
| AFUA_2G11120 | GTMA-R          | ATCCTTCTCGTGCGATTCTCGCTG     |
| AFUA_2G14570 | ZRCC-D          | AGGATCCGAGCGTTACATGCGTC      |
| AFUA_2G14570 | ZRCC-R          | GGACCTGAGGGTTCATCATTGC       |
| AFUA_2G15010 | RIM15-D         | GCCAAGTTACTCCTCCGATCATCGTG   |
| AFUA_2G15010 | RIM15-R         | GGCTTCGGAGTCAGTAGTCCGATTG    |

| Gene ID      | Oligonucleotide | 5'-sequence-3'               |
|--------------|-----------------|------------------------------|
| AFUA_2G15290 | AFX3-D          | GGAAAGGCTGTTTCATCGTATGTTCTGC |
| AFUA_2G15290 | AFX3-R          | CAGAAAGGAAGCTTGCTAACGGTCCAG  |
| AFUA_2G17550 | AYG1-D          | AAGCACGGGTACAAGACCGTCG       |
| AFUA_2G17550 | AYG1-R          | ATGCTCAAACAGCACCAGGCAGTC     |
| AFUA_3G02270 | CAT1-D          | ATGCAATCCAATTTGACGCTGTGGTC   |
| AFUA_3G02270 | CAT1-R          | CCGAACCGGAATCCGTCAATGAG      |
| AFUA_3G03640 | MIRB-D1         | TGCCATGCCTGACTTGAGCTTGATC    |
| AFUA_3G03640 | MIRB-R1         | GATGAAGCCCAGAACCATGAATGCAG   |
| AFUA_3G14440 | COX9-D          | CGTGGTCTTGTTCTAGACCTGAGC     |
| AFUA_3G14440 | COX9-R          | GATGGAGAATCAAGTCTATGCCTGCTG  |
| AFUA_4G03410 | FHPA-D          | TGGATCTGAGCCAGTTGGACAGC      |
| AFUA_4G03410 | FHPA-R          | CATTCAGCATGTCCGTCAATGACGTG   |
| AFUA_4G03460 | SRBB-D1         | CTCGCTGAAGAAGTCGGAGATCCTG    |
| AFUA_4G03460 | SRBB-R1         | GGTGCGAACTTGTCGTTCTCCTTG     |
| AFUA_4G03930 | CYS4-D          | ACTCGCATACTCCAAAGCCA         |
| AFUA_4G03930 | CYS4-R          | TGACCAAGACATGCTGACCA         |
| AFUA_4G06530 | METR-D          | GCTGGAGCTGGAGAATCAATGGC      |
| AFUA_4G06530 | METR-R          | GACTCGGAATACTCCGTTTCAGCG     |
| AFUA_4G09560 | ZRFC-D          | CAAACCTCTCGGTGCTCGTCA        |
| AFUA_4G09560 | ZRFC-R          | GAAGACAATCACCACCAGCA         |
| AFUA_4G09580 | ASPF2-D1        | ACCTGATGCACCGTCTGTACCATG     |
| AFUA_4G09580 | ASPF2-R1        | CGAAATACTGCAACGCCTCCGAGTC    |
| AFUA_4G10730 | RVB1-D          | ACAGGGTGGACAGGACGTCATGAG     |
| AFUA_4G10730 | RVB1-R          | AGAGCACGCCAGGTACAAGTTCAG     |
| AFUA_4G12840 | MDE1-D          | TGCATTCGAGGAGGATCTCACCG      |
| AFUA_4G12840 | MDE1-R          | CTGTGTCTTGGCTTTGGCAACGTC     |
| AFUA_5G01030 | GPDB-D1         | GGATCGGTCGCATTGTCTTTCGC      |
| AFUA_5G01030 | GPDB-R1         | GAGCCTTCGTCCTGGGAGATTTTCG    |
| AFUA_5G01970 | GPDA-D          | GGCGAGCTCAAAAACATCCTCGG      |
| AFUA_5G01970 | GPDA-R          | CACTCGTTGTCTGTACCAGGCG       |
| AFUA_5G02180 | CYSB-D          | CCATCAGCGACGAAAAGTCCATTGAG   |
| AFUA_5G02180 | CYSB-R          | CATACCGGTAAGCACCATCGCAC      |
| AFUA_5G03800 | FTRA-D          | CGTCTGGCATGTCAACTGCTGTAG     |
| AFUA_5G03800 | FTRA-R          | TGACGCATAGCCACAAACCAGACG     |
| AFUA_5G03920 | HAPX4-D         | TGCGGCGTTCAAGGAACAGATCAC     |
| AFUA_5G03920 | HAPX3-R         | AGCCTCCCTGTCCGAAAGAGACG      |
| AFUA_5G04130 | PHOA-D          | TCGAATGCTCCAATTACGGCCAG      |
| AFUA_5G04130 | PHOA-R          | TGTTGTTGCTGCAACTGAGCCTG      |
| AFUA_5G06240 | ALCC-D          | AGGACCTTCCGCGTATATTTGAGCTG   |
| AFUA_5G06240 | ALCC-R          | GTCAATCACCAATCGCTGCTATCTGC   |
| AFUA_5G06270 | HEMA-D          | CTGGAGGAGCACGGAATCTACGTC     |
| AFUA_5G06270 | HEMA-R          | GCGCTTGATACCAGATCGTTCCAG     |
| AFUA_5G08090 | PYROA-D         | GTGAGCTTGAGGTCCCTTATGAGCTTC  |
| AFUA_5G08090 | PYROA-R         | CGCTTCTTCGCATCACCAGACTTG     |
| AFUA_5G09240 | SODA-D2         | TTAAGCTGATTGGTGCCGAGAGCG     |
| AFUA_5G09240 | SODA-R2         | GCTTAAGCGGCGATACCAATGACAC    |
| AFUA_5G09360 | CALA-D          | GGGAGGAGTCTGAGAGAGTTACGG     |
| AFUA_5G09360 | CALA-R          | TGGAAGACGCTCGTTCTGCAAGTC     |
| AFUA_5G09680 | SDH3-D          | TCCCATTGCTGCCAAGGTTCTCATC    |
| AFUA_5G09680 | SDH3-R          | AGTCCAGCCAGACTTGATAACCTGC    |
| AFUA_5G10560 | COX5A-D         | GAAGAAGGCTGCCTACTGGATTGC     |
| AFUA_5G10560 | COX5A-R         | CTGCCACTCCTTGGTCATGGTC       |
| AFUA_6G00690 | AFX2-D          | TACTAGCGGGTCACAGAGGGTCAC     |
| AFUA_6G00690 | AFX2-R          | CATCACTGCAAACTGCGCAGAGC      |
| AFUA_6G04430 | ADI1-D          | ACGAAGACGAGGAGATCCGCTAC      |

| Gene ID      | Oligonucleotide | 5'-sequence-3'              |
|--------------|-----------------|-----------------------------|
| AFUA_6G04430 | ADI1-R          | TGTCATCGGTGGTGAAACGATGGTAG  |
| AFUA_6G04740 | qACT3-D         | CCACGTCACCACTTTCAACTCCATC   |
| AFUA_6G04740 | qACT3-R         | TCCTTCTGCATACGGTCGGAGATAC   |
| AFUA_6G05160 | AZF1-D          | GCCACTACGCTAAGAACGTTGACTCTG |
| AFUA_6G05160 | AZF1-R          | AGATCCTCCGATCCTTGCCACG      |
| AFUA_6G07720 | ACUF-D          | AACGTGGAGTACGAGACCTACGATG   |
| AFUA_6G07720 | ACUF-R          | TTGTTGACCTCGTCGGTGAAGC      |
| AFUA_6G07980 | CDC28-D         | GCTCATTGACCGTGATGGCAATCTG   |
| AFUA_6G07980 | CDC28-R         | CAGTAGAGTACTGACGACCACCAAGC  |
| AFUA_6G09630 | GLIZ-D1         | GTCCCGAAATCCACCAACTCTG      |
| AFUA_6G09630 | GLIZ-R          | AGAGGTGAGAACAGCCTACAGC      |
| AFUA_6G09710 | GLIA-D          | GCCTTCACCAACAAGCTGGTCC      |
| AFUA_6G09710 | GLIA-R          | CCAGCCACATACGCCTCGAGAATC    |
| AFUA_6G09740 | GLIT-D          | TCGCCAAGACCGTCATTGTTCATC    |
| AFUA_6G09740 | GLIT-R          | TTCTGT CATATTCAAGGCGAGCTGC  |
| AFUA_6G09930 | YAP1-D          | GCGAGGACAAGTCGAAATGCTC      |
| AFUA_6G09930 | YAP1-R          | TCTGGCTTTGGTGCGCAATTCTG     |
| AFUA_7G00250 | TUBB2-D         | TCAGTATCCATAACCAAGAACTCCG   |
| AFUA_7G00250 | TUBB2-R         | AACATGGCCGTGAACTGGGTCG      |
| AFUA_7G02560 | DLD1-D          | CGAGGCAACGAAGCAGGATATGACAG  |
| AFUA_7G02560 | DLD1-R          | CAACTGCTCGCTTGACCATTCTGG    |
| AFUA_7G04730 | ENB1-D          | GACCTCAAGTCCAATGCCACGTC     |
| AFUA_7G04730 | ENB1-R          | GCAATGGCAGGGATTCCCAGAATCAG  |
| AFUA_7G05070 | FRDA-D          | TGACGCCGGTCATTTCATTTCACG    |
| AFUA_7G05070 | FRDA-R          | ACACCACACACTCCAGAAGAGACG    |
| AFUA_7G06570 | qZRCA-D         | TGCAGAGTGTTCTCTCGGAGTCG     |
| AFUA_7G06570 | qZRCA-R         | TCGCCAGATATGCAGTTCATGGACG   |
| AFUA_7G06790 | YCT1-D          | ACACCTCGCAACAACCTTCCT       |
| AFUA_7G06790 | YCT1-R          | ATGGCAGCGGAAACAAGGAT        |
| AFUA_8G02450 | GZBA-D          | CGACTTCTGATGACCACGACCACG    |
| AFUA_8G02450 | GZBA-R          | CCAATGGTCGTTGTGCGGTTTGC     |
| AFUA_8G02620 | qMCHC-D         | CATGCTAACGATGGGATGCG        |
| AFUA_8G02620 | qMCHC-R         | CTTCGGTCTCCCAATGGTGG        |
| GFP          | qGFP2-D         | CATGCCCCAAGGCTACGTC         |
| GFP          | qGFP2-R         | CCGTCTCTCTTGAAGTCGATG       |
| LUC          | qLUC-D          | ATGATCATGTCCGGCTACGTC       |
| LUC          | qLUC-R          | CCCTTGTA CTTGATCAGGGACTTC   |
