# Supplementary material for: The Transcription Factor ZafA Regulates the Homeostatic and Adaptive Response to Zinc Starvation in Aspergillus fumigatus
Source: MDPI journal article supplement (doi:10.3390/genes9070318), 2018-06-26
Supplement: s1 [file s1]

**Table S2.** Oligonucleotides used in this study for construction of plasmids and validation of fungal strains.

| Oligonucleotide | 5'-sequence-3'                             |
|-----------------|--------------------------------------------|
| JA007           | CATAGCTTTCGGAATCATCCGACTCG                 |
| JA181           | CGGGAATTCGATTAGTGCTAGCAAAAACTTCAAATGTTTCGG |
| JA182           | CGGGAATTCGATTCCAACCTCCAATGTC               |
| JA194           | GGCGCCGTTAAACCCATTGTGAGTACAT               |
| JA196           | TCTAGAAGATCTGGCCATGATTGCTTGG               |
| JA197           | TGTCTCCATCCAGATTGGCACGC                    |
| JA204           | TAGGATTGACCGCCTGCAGTGTGC                   |
| JA261           | TGGTACCTCTAGATGGCCATGGTGAGGCGAGGTGATAGG    |
| JA274           | ATAAAGACCCCCTCAGTTCTCAGTCTCAC              |
| JA275           | GTGAGACTGAGAACTGAGGGGGTCTTTAT              |
| JA298           | AGATCCGCCACAACATCGAGGACGGC                 |
| JA375           | TGTACACGCGCCCATATGCAAG                     |
| JA376           | TGTACACAATGCATGGAGGC                       |
| JA377           | CTTTCGCCGTGAACACACCAC                      |
| JA378           | ACAGGCTAACGCTTGTGATGAC                     |
| JA379           | GACATGGTTGCATCATCCGCATCG                   |
| JA380           | TCGGACATAACGAACGACTC                       |
| JA381           | ACTCCCTTGGATCAAGCTGTGG                     |
| JA388           | ATGTCCGCACGGAGAGCCACAAAC                   |
| JA394           | GCCTGACAATTCAGGCGATACG                     |
| JA439           | 6FAM-GAGGGAAAGGGGCCCTGGTAATAC              |
| JA463           | GAAGTCCCTGATCAAGTACAAGGGCTAC               |
| JA505           | GCCGTTAGGGATATCTGCAATGAGTGCGT              |
| FAM-Fw          | 6FAM-ACGACTCACTATAGGGCGAATTGGG             |
| FAM-Rv          | 6FAM-CAGCTATGACCATGATTACGCCAAGC            |
| Fw              | ACGACTCACTATAGGGCGAATTGGG                  |
| Rv              | CAGCTATGACCATGATTACGCCAAGC                 |
