# Supplementary material for: The Transcription Factor ZafA Regulates the Homeostatic and Adaptive Response to Zinc Starvation in Aspergillus fumigatus
Source: MDPI journal article supplement (doi:10.3390/genes9070318), 2018-06-26
Supplement: s1 [file s1]

**Table S7.** Control genes used for MEME analysis

| Gene ID      | Type of gene                      |
|--------------|-----------------------------------|
| AFUA_1G02580 | SSA                               |
| AFUA_1G04190 | SSA                               |
| AFUA_1G04930 | Non influenced by zinc starvation |
| AFUA_1G04950 | Non influenced by zinc starvation |
| AFUA_1G06060 | Non influenced by zinc starvation |
| AFUA_1G06860 | SSA                               |
| AFUA_1G07160 | Non influenced by zinc starvation |
| AFUA_1G08790 | Non influenced by zinc starvation |
| AFUA_1G09800 | SSA                               |
| AFUA_1G10880 | SSA                               |
| AFUA_1G11930 | SSA                               |
| AFUA_1G12000 | SSA                               |
| AFUA_1G13570 | SSA                               |
| AFUA_1G13610 | SSA                               |
| AFUA_1G13620 | SSA                               |
| AFUA_1G14730 | Non influenced by zinc starvation |
| AFUA_1G16780 | Non influenced by zinc starvation |
| AFUA_2G01550 | Non influenced by zinc starvation |
| AFUA_2G02730 | Non influenced by zinc starvation |
| AFUA_2G03140 | SSA                               |
| AFUA_2G03390 | Non influenced by zinc starvation |
| AFUA_2G04650 | Non influenced by zinc starvation |
| AFUA_2G08850 | Non influenced by zinc starvation |
| AFUA_2G10270 | SSA                               |
| AFUA_2G10340 | Non influenced by zinc starvation |
| AFUA_2G10730 | Non influenced by zinc starvation |
| AFUA_2G12030 | SSA                               |
| AFUA_2G13240 | SSA                               |
| AFUA_2G13490 | Non influenced by zinc starvation |
| AFUA_3G03620 | Non influenced by zinc starvation |
| AFUA_3G04150 | Non influenced by zinc starvation |
| AFUA_3G04160 | Non influenced by zinc starvation |
| AFUA_3G06970 | SSA                               |
| AFUA_3G07590 | SSA                               |
| AFUA_3G07940 | SSA                               |
| AFUA_3G08010 | Non influenced by zinc starvation |
| AFUA_3G10310 | SSA                               |
| AFUA_4G05940 | SSA                               |
| AFUA_4G06870 | SSA                               |
| AFUA_4G07420 | SSA                               |
| AFUA_4G08730 | SSA                               |
| AFUA_4G10780 | Non influenced by zinc starvation |
| AFUA_4G12080 | SSA                               |
| AFUA_4G12830 | Non influenced by zinc starvation |
| AFUA_5G02360 | Non influenced by zinc starvation |
| AFUA_5G04240 | SSA                               |
| AFUA_5G05740 | SSA                               |
| AFUA_5G05790 | Non influenced by zinc starvation |
| AFUA_5G05920 | SSA                               |
| AFUA_5G07050 | Non influenced by zinc starvation |
| AFUA_5G07100 | Non influenced by zinc starvation |
| AFUA_5G08330 | SSA                               |
| AFUA_5G11240 | Non influenced by zinc starvation |
| AFUA_5G11820 | Non influenced by zinc starvation |

| Gene ID      | Type of gene                      |
|--------------|-----------------------------------|
| AFUA_5G12130 | SSA                               |
| AFUA_5G13920 | SSA                               |
| AFUA_6G01930 | SSA                               |
| AFUA_6G04290 | SSA                               |
| AFUA_6G04600 | Non influenced by zinc starvation |
| AFUA_6G04680 | SSA                               |
| AFUA_6G06860 | Non influenced by zinc starvation |
| AFUA_6G07640 | Non influenced by zinc starvation |
| AFUA_6G10460 | SSA                               |
| AFUA_6G12370 | Non influenced by zinc starvation |
| AFUA_6G13945 | SSA                               |
| AFUA_7G01860 | SSA                               |
| AFUA_7G05260 | SSA                               |
| AFUA_7G05930 | Non influenced by zinc starvation |
| AFUA_8G00100 | SSA                               |
| AFUA_8G02780 | Non influenced by zinc starvation |
| AFUA_8G04270 | SSA                               |
